# Supplementary material for: Phase transition and electronic properties of Co–As binary compounds at high pressure
Source: Royal Society of Chemistry journal article supplement (doi:10.1039/d2ra02114e), 2022-01-01
Supplement: d2ra02114e1.pdf [file d2ra02114e1.pdf]

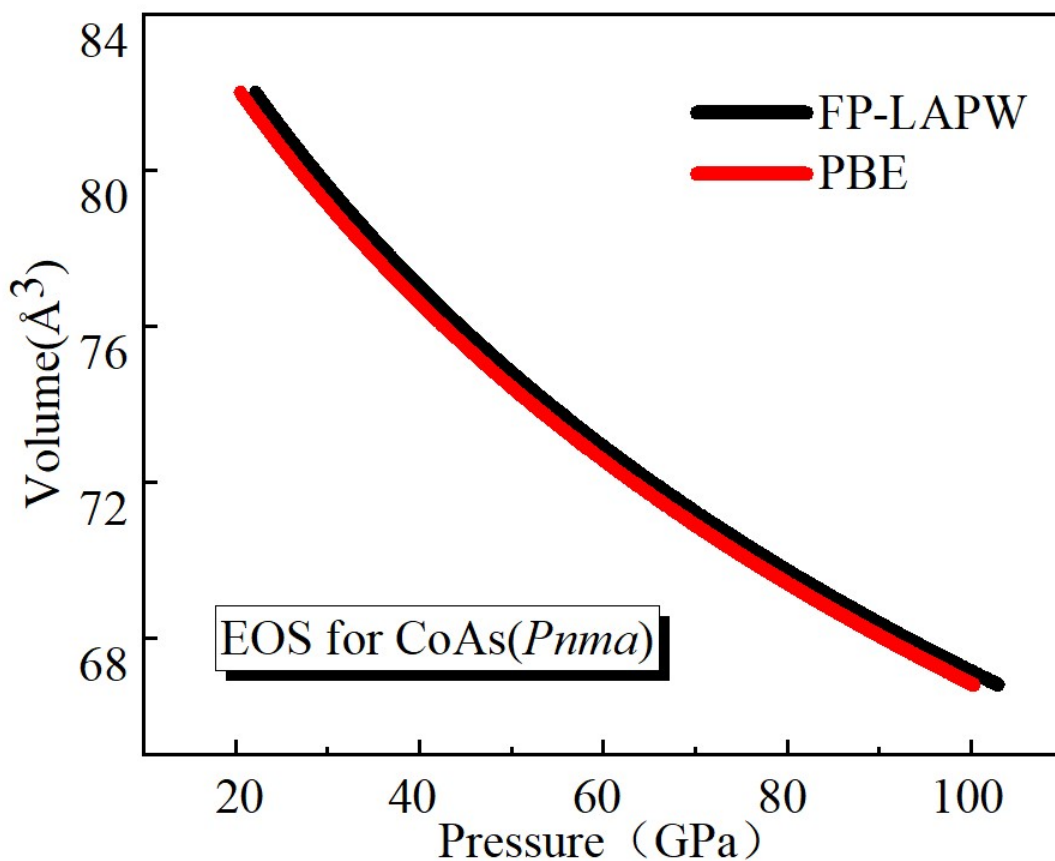

**Supplemental Figure 0.** Volumes as a function of pressures for *Pnma*-CoAs calculated by using the generalized gradient approximation Perdew-Burke-Ernzerhof in VASP calculations and full-potential in WIEN2K calculations. The two calculations gave identical results. The results suggest the generalized gradient approximation Perdew-Burke-Ernzerhof is reliable in the pressure range of current work.

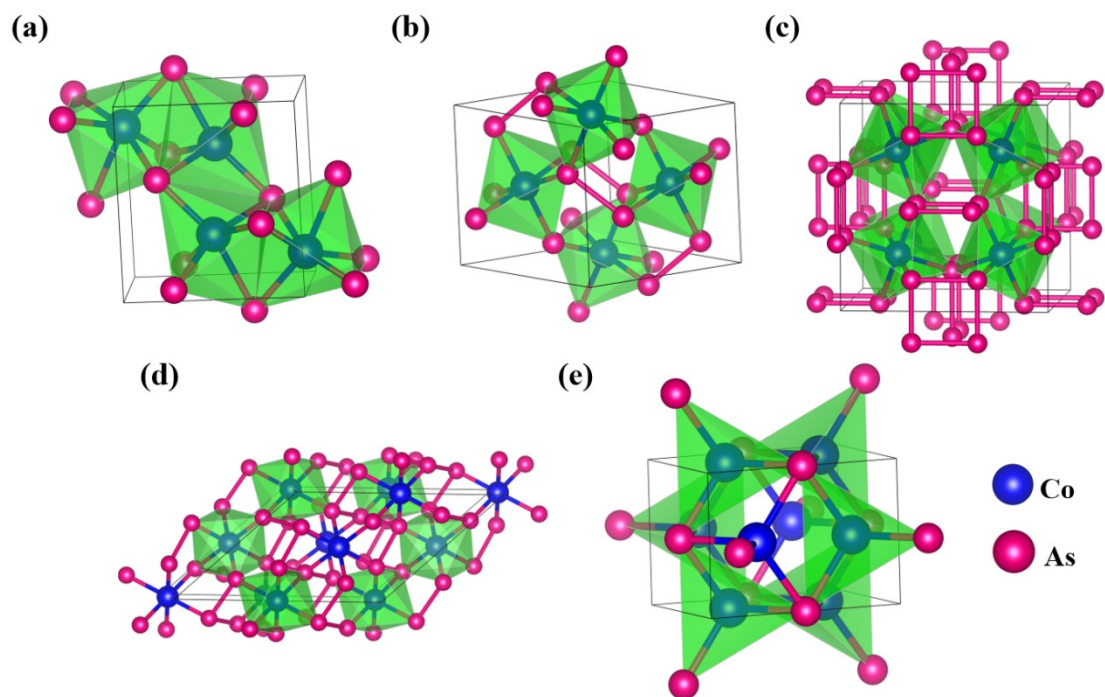

**Supplemental Figure 1.** Structures of predicted stable Co-As system for (a)  $Pnma$  structure of  $\text{CoAs}$ ; (b)  $P2_1/c$  structure of  $\text{CoAs}_2$ ; (c)  $Im-3$  structure of  $\text{CoAs}_3$ ; (d)  $C2/c$  structure of  $\text{CoAs}_3$ ; and (e)  $I4/mmm$  structure of  $\text{Co}_2\text{As}$ . The blue and pink spheres are Co atom and As atom, respectively.

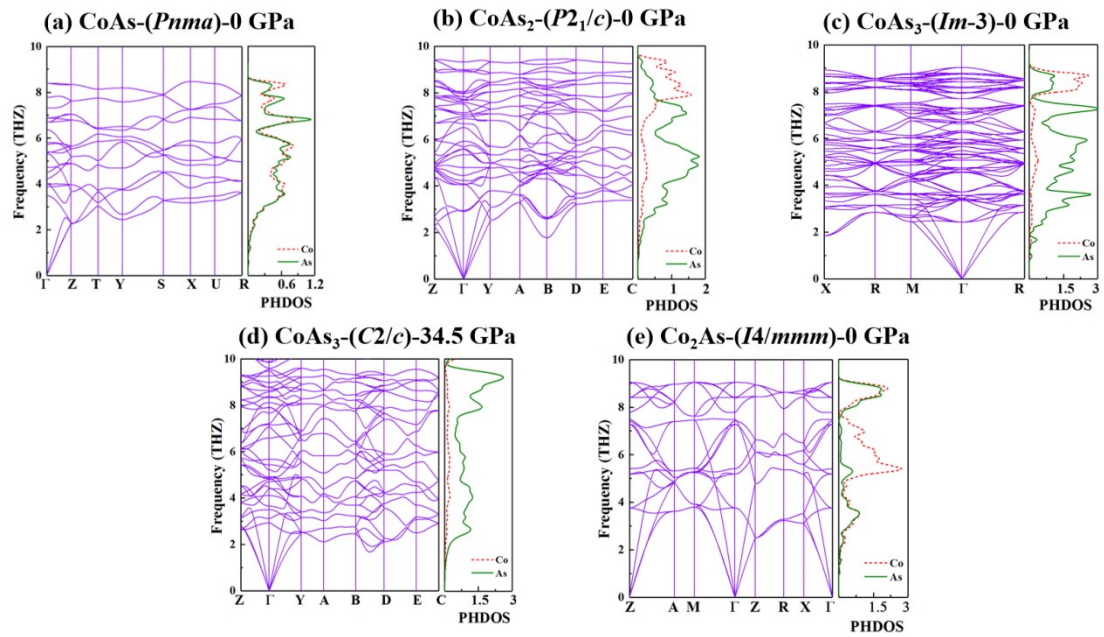

**Supplemental Figure 2.** Phonon dispersion relations and PHDOS projected on Co atoms and As atoms of structures with stable existence predicted in the Co-As system:(a) CoAs-*Pnma* at 0 GPa; (b) CoAs<sub>2</sub>-*P2*<sub>1</sub>/*c* at 0 GPa; (c) CoAs<sub>3</sub>-*Im*-3 at 0 GPa; (d) CoAs<sub>3</sub>-*C2*/*c* at 34.5 GPa; and (e) Co<sub>2</sub>As-*I4*/*mmm* at 0 GPa.

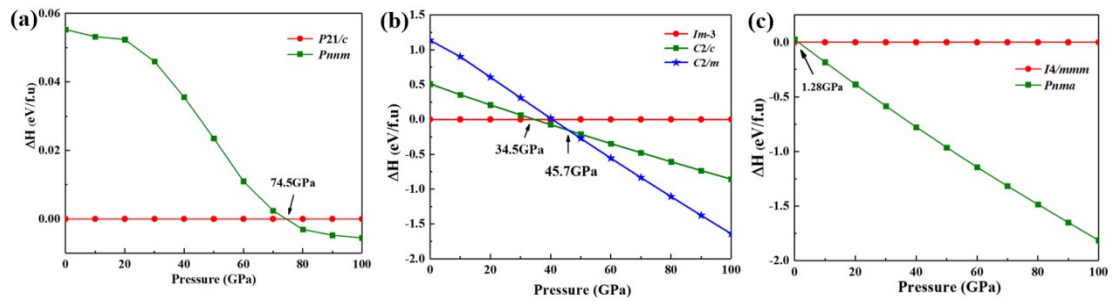

**Supplemental Figure 3.** Calculated enthalpy difference as a function of pressure relative to (a) CoAs<sub>2</sub>, (b) CoAs<sub>3</sub> and (c) Co<sub>2</sub>As.

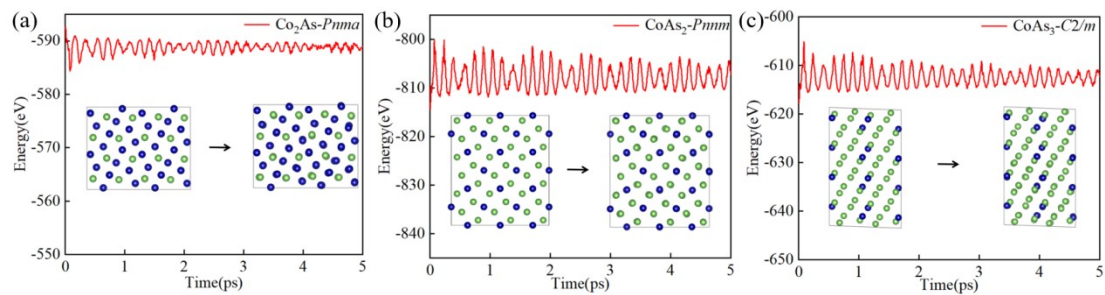

**Supplemental Figure 4.** Calculated the ab initio molecular dynamics at 300K for (a)  $\text{Co}_2\text{As-Pnma}$ , (b)  $\text{CoAs}_2\text{-Pnmm}$ , and (c)  $\text{CoAs}_3\text{-C2/m}$ , respectively.

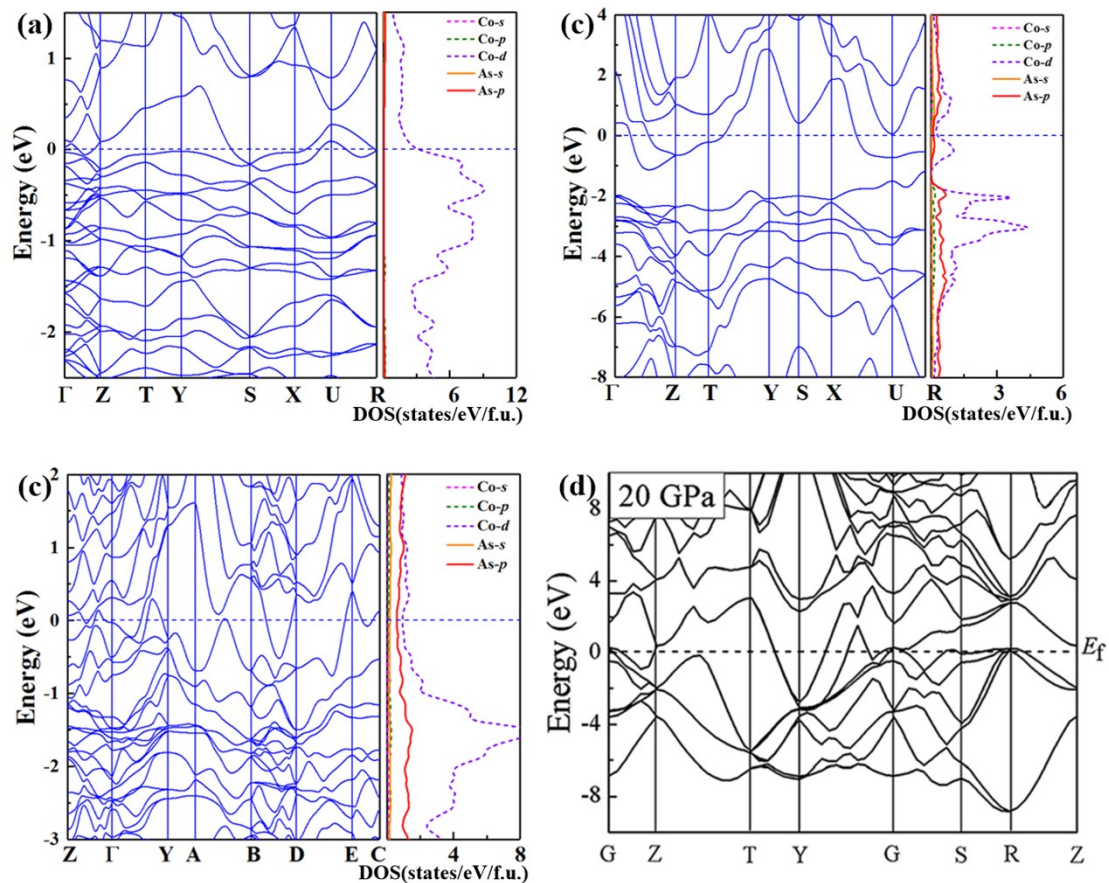

**Supplemental Figure 5.** Electronic band structure and the projected electronic DOS on Co atoms and As atoms for (a)  $\text{Co}_2\text{As}$ - $Pnma$  at 1.28 GPa; (b)  $\text{CoAs}_2$ - $Pnnm$  at 74.5 GPa; (c)  $\text{CoAs}_3$ - $C2/m$  at 45.7 GPa. And figure (d) shows the electronic band structure of GaAs at 20GPa.<sup>[1]</sup> Note that Zero energy is at the Fermi level.

**Supplemental Table 1.** Structural information of the predicted stable compounds.

|                         | Phase    | Lattice Parameters (Å) |             | Atom<br>s             | Wyckoff<br>position | x           | y      | z     |        |
|-------------------------|----------|------------------------|-------------|-----------------------|---------------------|-------------|--------|-------|--------|
| <b>CoAs</b>             | 0 GPa    | <i>Pnma</i>            | $a = 5.350$ | $\alpha = 90.0^\circ$ | Co1                 | 4 <i>c</i>  | 1.000  | 0.750 | 0.198  |
|                         |          |                        | $b = 3.499$ | $\beta = 90.0^\circ$  | As1                 | 4 <i>c</i>  | 0.702  | 0.250 | 0.089  |
|                         |          |                        | $c = 5.883$ | $\gamma = 90.0^\circ$ |                     |             |        |       |        |
| <b>CoAs<sub>2</sub></b> | 0 GPa    | <i>P21/c</i>           | $a = 5.938$ | $\alpha = 90.0^\circ$ | Co1                 | 4 <i>e</i>  | 0.272  | 0.001 | 0.286  |
|                         |          |                        | $b = 5.891$ | $\beta = 116.0^\circ$ | As1                 | 4 <i>e</i>  | 0.153  | 0.634 | 0.368  |
|                         |          |                        | $c = 5.994$ | $\gamma = 90.0^\circ$ | As2                 | 4 <i>e</i>  | 0.343  | 0.136 | 0.675  |
| <b>CoAs<sub>3</sub></b> | 0 GPa    | <i>Im-3</i>            | $a = 8.335$ | $\alpha = 90.0^\circ$ | Co1                 | 8 <i>c</i>  | 0.750  | 0.750 | 0.750  |
|                         |          |                        | $b = 8.335$ | $\beta = 90.0^\circ$  | As1                 | 24 <i>g</i> | 0.000  | 0.341 | 0.152  |
|                         |          |                        | $c = 8.335$ | $\gamma = 90.0^\circ$ |                     |             |        |       |        |
| <b>CoAs<sub>3</sub></b> | 34.5 GPa | <i>C2/c</i>            | $a = 9.781$ | $\alpha = 90.0^\circ$ | Co1                 | 4 <i>b</i>  | 0.000  | 0.500 | 0.000  |
|                         |          |                        | $b = 4.532$ | $\beta = 137.9^\circ$ | As1                 | 8 <i>f</i>  | 0.300  | 1.342 | -0.315 |
|                         |          |                        | $c = 7.664$ | $\gamma = 90.0^\circ$ | As2                 | 4 <i>e</i>  | -0.500 | 1.264 | 0.250  |
| <b>Co<sub>2</sub>As</b> | 0 GPa    | <i>I4/mmm</i>          | $a = 3.829$ | $\alpha = 90.0^\circ$ | Co1                 | 4 <i>d</i>  | 0.500  | 0.000 | 0.750  |
|                         |          |                        | $b = 3.829$ | $\beta = 90.0^\circ$  | As1                 | 2 <i>b</i>  | 0.000  | 0.000 | 0.500  |
|                         |          |                        | $c = 5.420$ | $\gamma = 90.0^\circ$ |                     |             |        |       |        |

We used rotationally invariant DFT+U version proposed by Dudarev et al.<sup>[2]</sup> In this method, the parameters U and J represented on-site Coulomb interaction energy and exchange energy, respectively. The parameters U and J were not used separately, only their difference U-J was meaningful. we use (U-J)=1.8 eV for Co, where the exchange energy parameter is set to the typical value of J=1 eV.<sup>[3]</sup> Moreover, by comparing with the case without U, the result proved that U had less impact on the Co-As system. Thus, we ignore the effect of the U value for the Co-As system.

**Supplemental Table 2.** Calculated lattice parameter  $a_0$  (Å), atomic volume  $V$  (Å<sup>3</sup>), the magnetic moments  $M$  (μB), and the bandgap (eV) for CoP<sub>3</sub>-*Im*-3 at 0 GPa by GGA and GGA+U, respectively, together with experimental data.

| Phase                                                | Method              | $a_0$ (Å) | $V$ (Å <sup>3</sup> ) | $M$ (μB) | Bandgap(eV) |
|------------------------------------------------------|---------------------|-----------|-----------------------|----------|-------------|
| CoAs <sub>3</sub> - <i>Im</i> -3-<br>our calculation | GGA                 | 8.271     | 565.81                | 0        | none        |
|                                                      | GGA+U               | 8.260     | 563.56                | 0        | none        |
| Reference                                            | exp. <sup>[4]</sup> | 8.208     | 552.98                | 0        | none        |

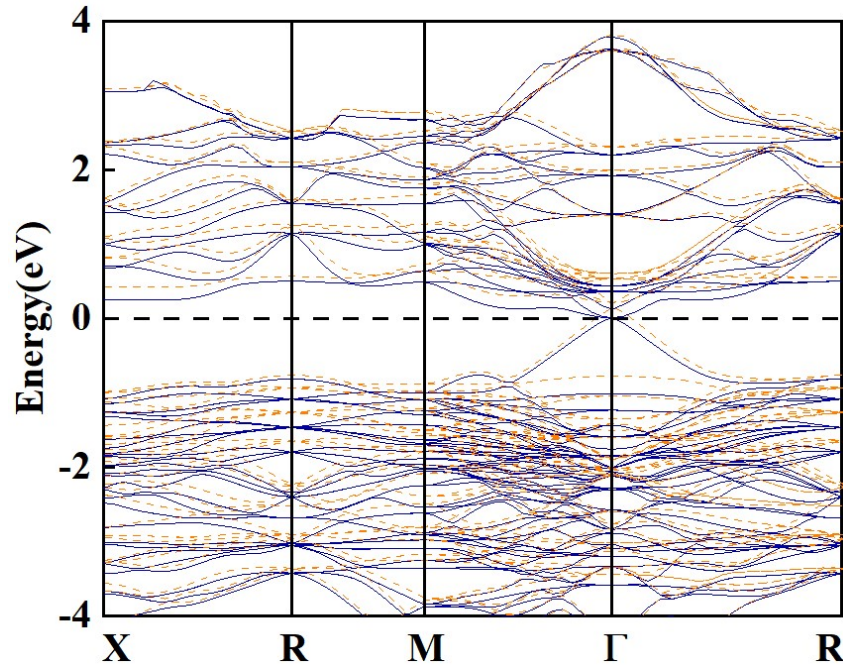

**Supplemental Figure 6.** Calculated the electronic band structure for CoP<sub>3</sub>-*Im*-3 at 0 GPa by GGA and GGA+U, respectively. The dashed (orange) and solid (blue) lines in the band structures represent the results obtained using the GGA and GGA+U, respectively.



- [1] J. Wang, B. Wu, G. Zhang, L. Tian, G. Gu, C. Gao. *Rsc. Adv.* 2016, **6(12)**, 10144-10149.
- [2] S.L. Dudarev, G.A. Botton, S.Y. Savrasov, C.J. Humphreys, A.P. Sutton, *Phys. Rev. B.* 1998, **57**, 1505.
- [3] Y. S. Mohammed, Y. Yan, H. Wang, K. Li, X. Du, *J. Magn. Magn. Mater.*, 2010, **322(6)**, 653-657.
- [4] J. Ackermann, A. Wold, *J. Phys. Chem. Solid.*, 1977, **38(9)**, 1013-1016.
